# Supplementary material
Source: HighWire-hosted journal article supplement (https://bjsm.bmj.com/content/51/12/958)
Supplement: inline-supplementary-material-1 [file inline-supplementary-material-1.docx]

**Appendix A: Medline search strategy**

*Sport:*

1. exp sports/
2. exp athletic injuries/
3. exp sports medicine/
4. (athlet* or sport* or player*).mp
5. (football* or rugby or soccer or box* or martial arts or hockey or horse rac* or horse rid* or equestrian or basketball or gymnast* or volleyball or netball or wrestl* or tennis or baseball).tw
6. or/1-5

*Concussion/ post-concussion syndrome*

1. exp brain injuries/
2. (((severe or moderate) adj2 (head or brain or traumatic or tbi) not (mild or minor or minimal)).tw
3. 7 not 8
4. exp brain concussion/
5. concuss*.mp
6. commotio cerebri.mp
7. ((mild or minor or minimal) adj3 (traumatic brain or tbi)).tw
8. mtbi.mp
9. (prolong* or persist* or unresolved or delay*).mp
10. (or/9-14) and 15
11. exp post-concussion syndrome/
12. (post-concuss* or postconcuss*).mp
13. or/16-18

*Investigation/assessment:*

1. exp diagnosis/
2. exp biomarker/
3. (investigat* or screen* or diagnos* or assess* or test*).mp
4. ((neuropsych* or cognitive or psychometric) adj2 (function* or test*)).tw
5. ((vision or visual function*) adj2 test*).tw
6. ((vestibul*) adj2 test*).mp
7. ((post-concuss* or postconcuss or symptom or anxiety or depression) adj3 (scale or index)).mp
8. (balance or BESS).mp
9. (standardi?ed assessment or SAC).mp
10. (sport* concussion assessment tool or SCAT*).mp
11. (scan or imag* or magnetic resonance or MRI or positron emission tomograph* or PET or MRS or DTI).mp
12. (electroencephalogra* or EEG).mp
13. (biomarker* or gene*).mp
14. (transcranial magnetic stimulation or TMS).mp
15. or/20-33

*Treatment:*

1. exp therapeutics/
2. exp treatment outcome/
3. exp exercise therapy/
4. exp exercise/
5. exp cognitive therapy/
6. (treat* or manage* or rehab* or exercis* or pharmacotherapy or brain train or neurorehab* or train* or physiotherapy or physical therapy).mp
7. (drug* or medication* or supplement*).mp
8. (cognitive adj2 therapy).mp
9. or/35-42
10. 6 and 19
11. 44 and 34
12. 44 and 43
13. 45 or 46
